# Supplementary material for: Efficient photosensitization of terbium ions enabled by hydrolysis of siloxy groups in ligands with specific side-chains
Source: Royal Society of Chemistry journal article supplement (doi:10.1039/c0pp00260g), 2010-10-26
Supplement: c0pp00260g.pdf [file c0pp00260g.pdf]

*Supporting information for*

Efficient photosensitization of terbium ions enabled by hydrolysis  
of siloxy groups in ligands with specific side-chains

QianMing Wang<sup>\*,a,#</sup>, Keishiro Ogawa<sup>a</sup>, Yan Li<sup>b</sup>, and Hitoshi Tamiaki<sup>a</sup>

<sup>a</sup> *Department of Bioscience and Biotechnology, Ritsumeikan University, Kusatsu, Shiga*

*525-8577, Japan*

<sup>b</sup> *School of Chemistry and Environment, South China Normal University, Guangzhou*

*510006, P. R. China*

[\*] Corresponding author. E-mail: [qmwang@scnu.edu.cn](mailto:qmwang@scnu.edu.cn)

[#] The present address is School of Chemistry and Environment, South China Normal  
University, Guangzhou 510006, P. R. China.

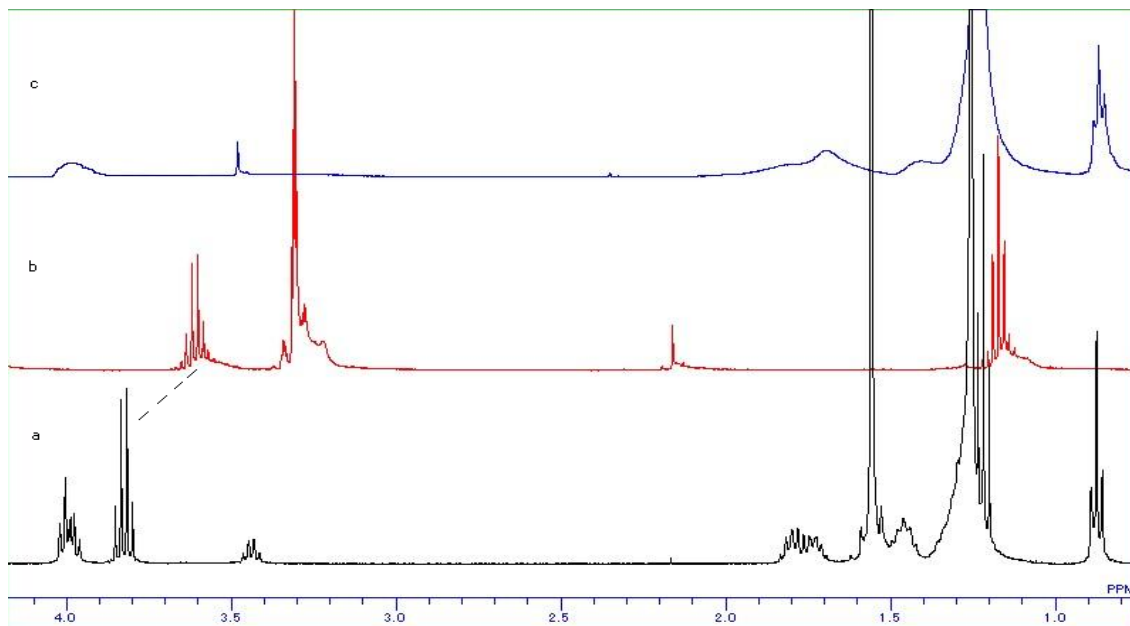

**Figure S1. a:**  $^1\text{H}$  NMR spectrum of compound **1** in  $\text{CDCl}_3$ ; **b:**  $^1\text{H}$  NMR spectrum was observed when 6.7 mg of **1** was dissolved in 0.7 ml of  $\text{CD}_3\text{OD}$  at  $50^\circ\text{C}$ , to which was added 0.7 ml of  $\text{HCl}$  ( $\text{pH} = 1.0$ ) in  $\text{CD}_3\text{OD}$  and stirred for 6 hours. No peaks from compound **1** were detected; **c:**  $^1\text{H}$  NMR spectrum of solid of hydrolyzed products precipitated from the reaction of **1** in  $\text{CDCl}_3$ .

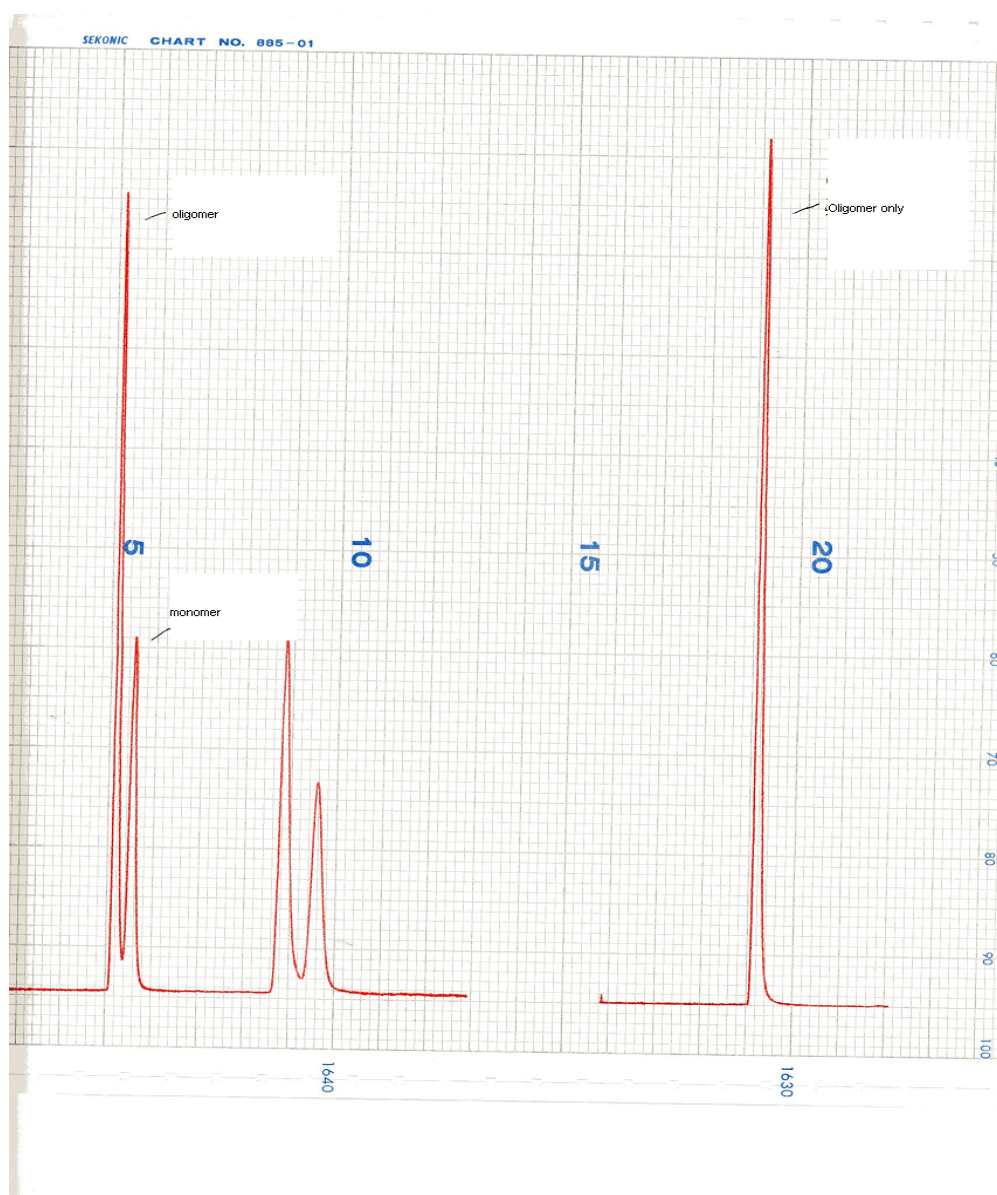

**Figure S2.** We manually mixed free compound **1** (monomer) and hydrolyzed oligomer in  $\text{CHCl}_3$ , then eluted by  $\text{CHCl}_3$  through polystyrene packed column in GPC (left), and oligomer only (right).

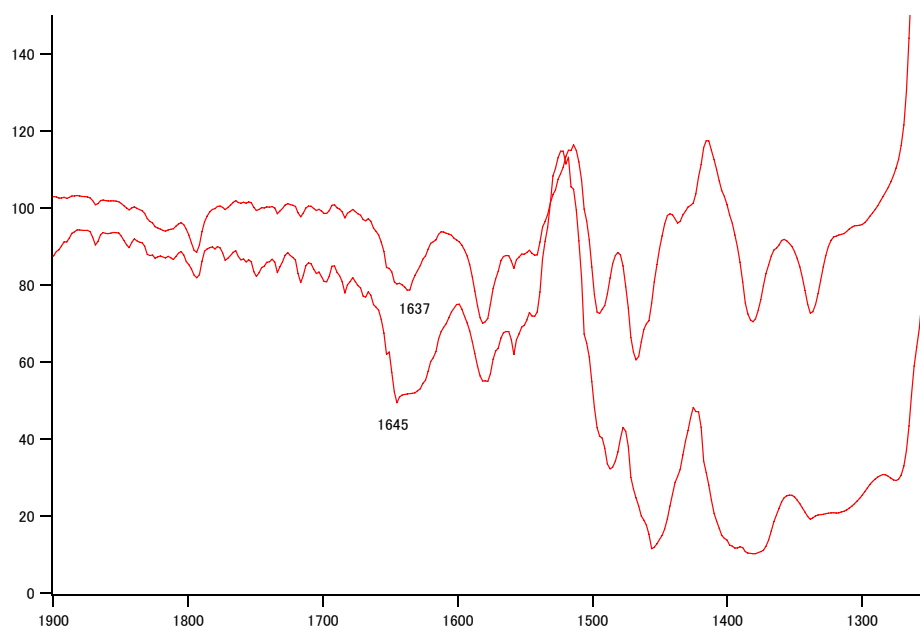

**Figure S3.** IR spectra of hydrolytic compound **1** before (top) and after addition of terbium ions ( $1/Tb = 1/1$ ) (lower).

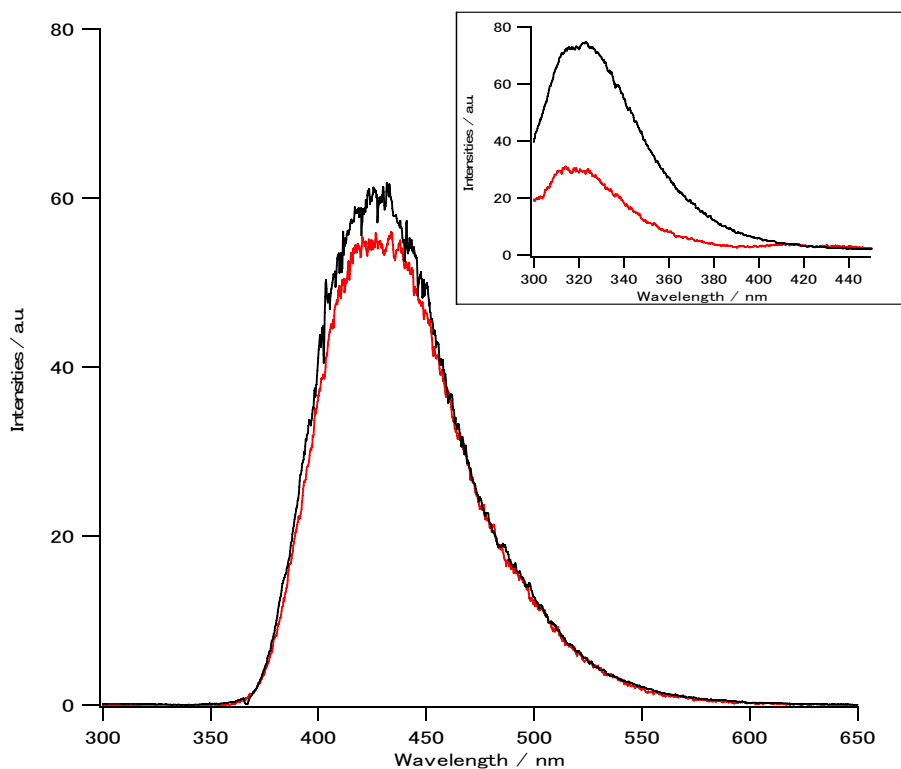

**Figure S4.** Phosphorescence spectra of compound **1** with Tb ions ( $1/\text{Tb} = 1/1$ ,  $5 \times 10^{-6}$  M,  $\text{CHCl}_3/\text{EtOH} = 99/1$ ) before (red) and after hydrolysis (black). Ex = 280 nm. Inset: Emission of compound **1** ( $5 \times 10^{-6}$  M,  $\text{CHCl}_3$ ) before (red) and after hydrolysis (black).

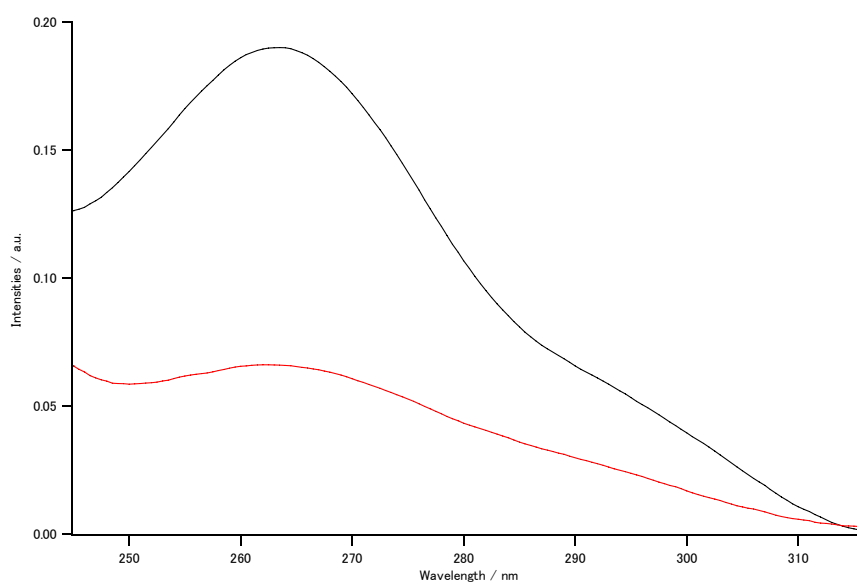

**Figure S5.** Absorption spectra of compound **1** ( $5 \times 10^{-6}$  M,  $\text{CHCl}_3$ ) before (red) and after hydrolysis (black).

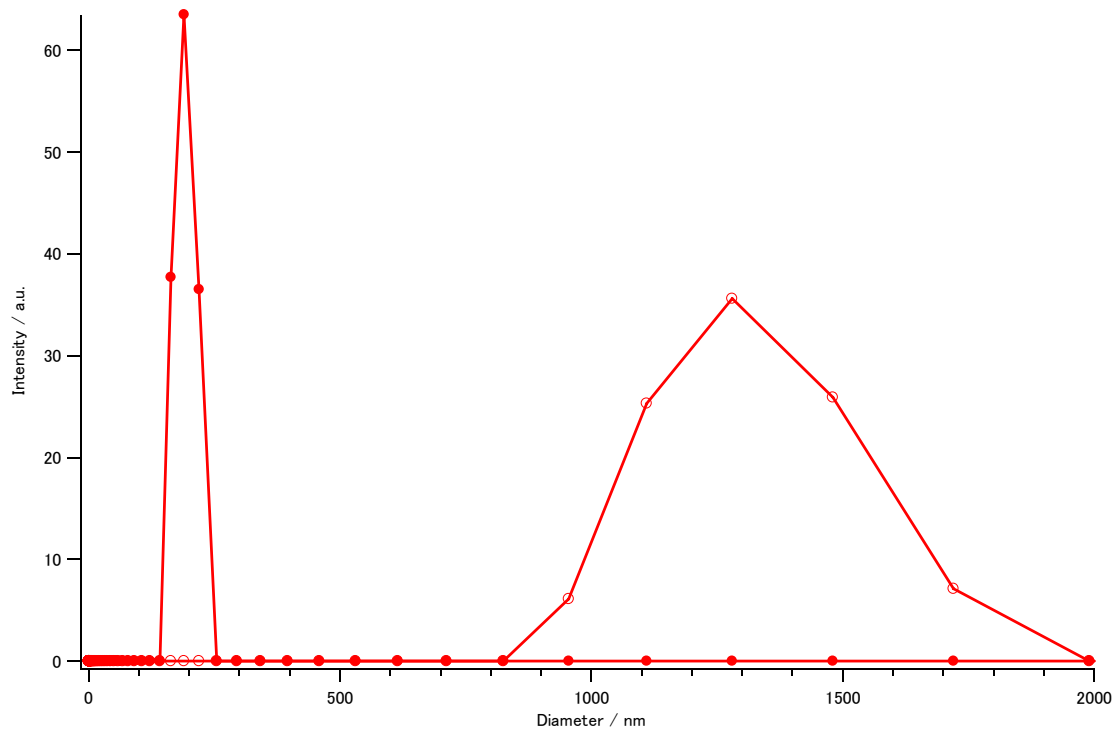

**Figure S6.** DLS data of compound **1** ( $5 \times 10^{-6}$  M,  $\text{CHCl}_3$ ) before (full circle) and after hydrolysis (empty circle).

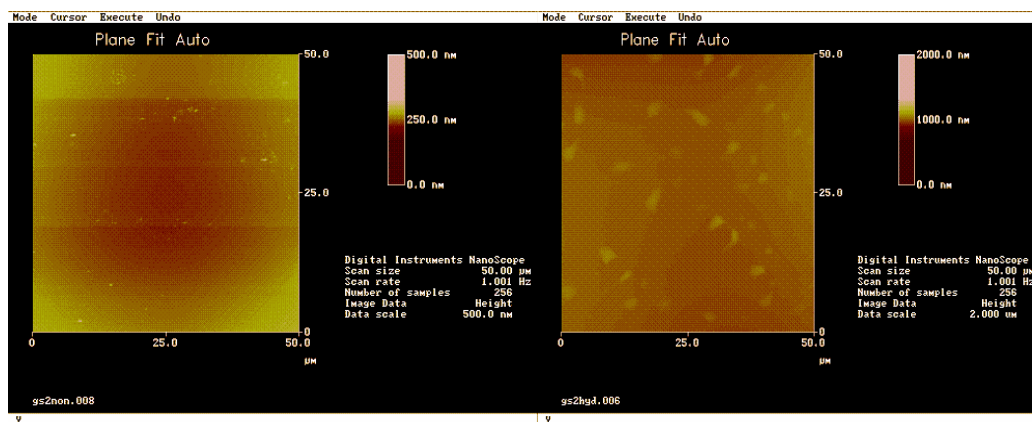

a

b

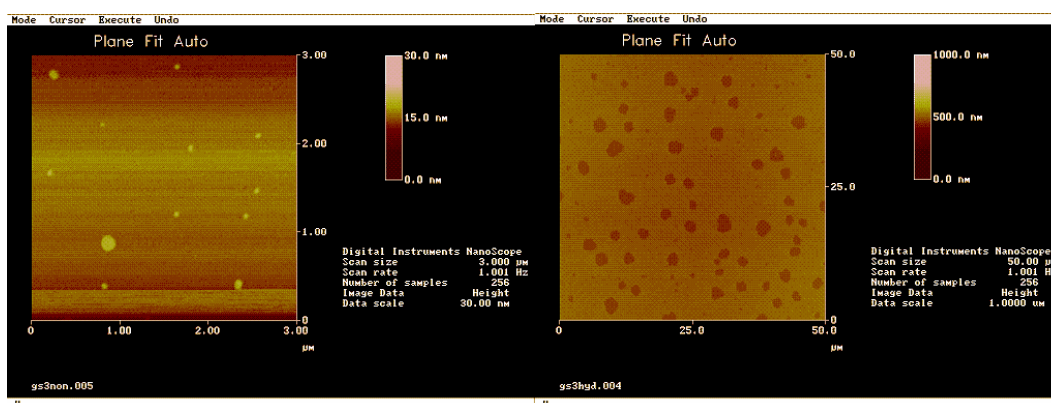

c

d

**Figure S7.** AFM of compounds **2** (upper) and **3** (lower,  $10^{-3}$  M,  $\text{CHCl}_3$ ) before (a,c) and after hydrolysis (b,d).



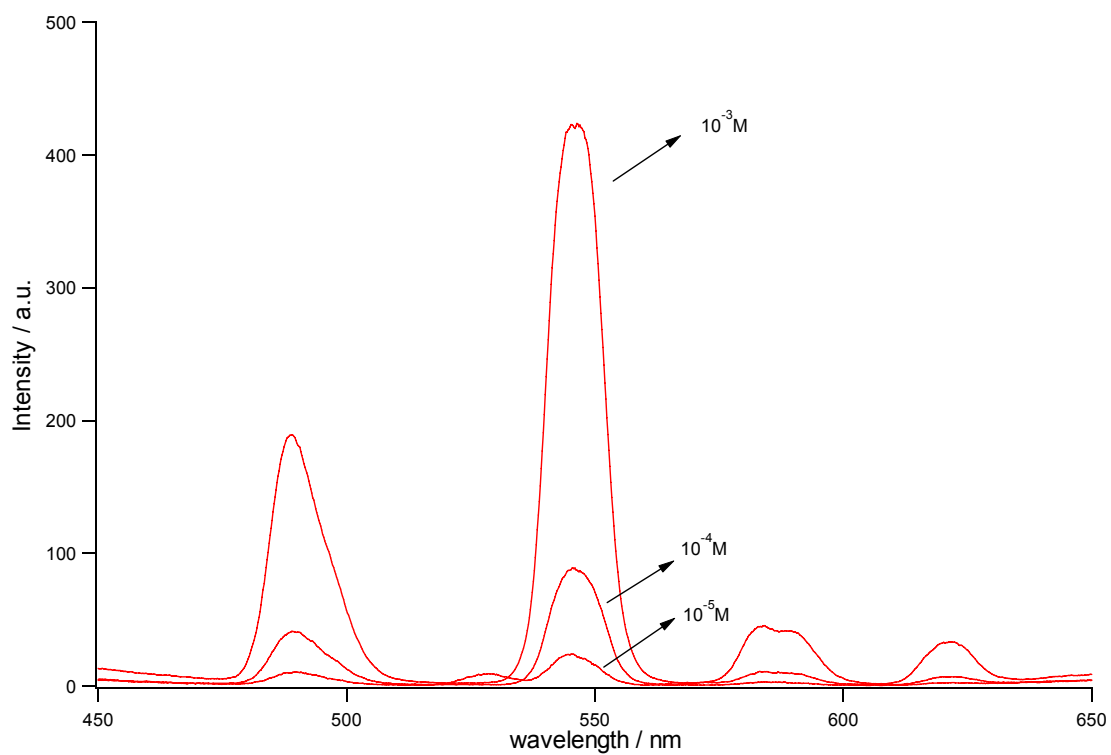

a

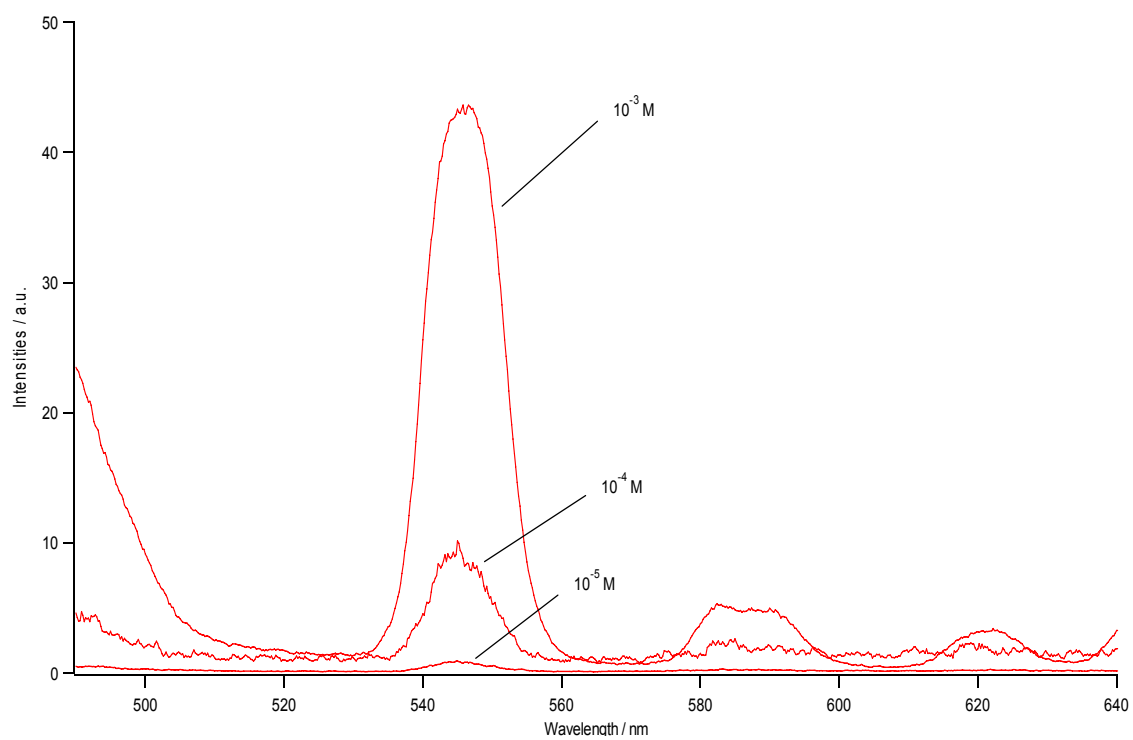

b

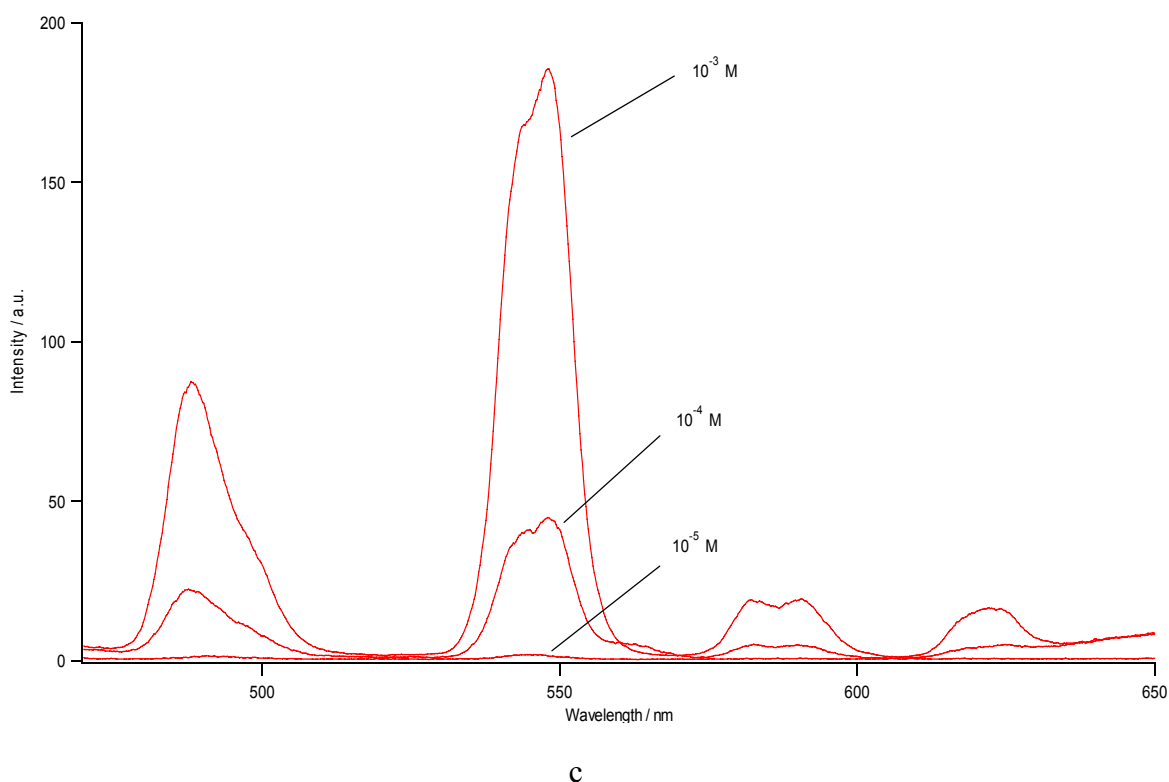

**Figure S8. a:** Emission spectra of compound **1** ( $10^{-5}$  to  $10^{-3}$  M) with Tb ions (Tb was fixed as  $10^{-5}$  M,  $\text{CHCl}_3/\text{EtOH} = 99/1$ ).  $\text{Ex} = 280$  nm. **b:** Emission spectra of compound **2** ( $10^{-5}$  to  $10^{-3}$  M) with Tb ions (Tb was fixed as  $10^{-5}$  M,  $\text{CHCl}_3/\text{EtOH} = 99/1$ ).  $\text{Ex} = 280$  nm. **c:** Emission spectra of compound **3** ( $10^{-5}$  to  $10^{-3}$  M) with Tb ions (Tb was fixed as  $10^{-5}$  M,  $\text{CHCl}_3/\text{EtOH} = 99/1$ ).  $\text{Ex} = 280$  nm.
